# Supplementary material for: Direct targeting of risk factors significantly increases the detection of liver cirrhosis in primary care: a cross-sectional diagnostic study utilising transient elastography
Source: HighWire-hosted journal article supplement (doi:10.1136/bmjopen-2014-007516), 2015-05-01
Supplement: bmjopen-2014-007516supp.pdf [file bmjopen-2014-007516supp.pdf]

# Supplementary Fig 1: Histopathology findings of patients with elevated liver stiffness undergoing liver biopsy (n=25)

Supplementary Figure 1:

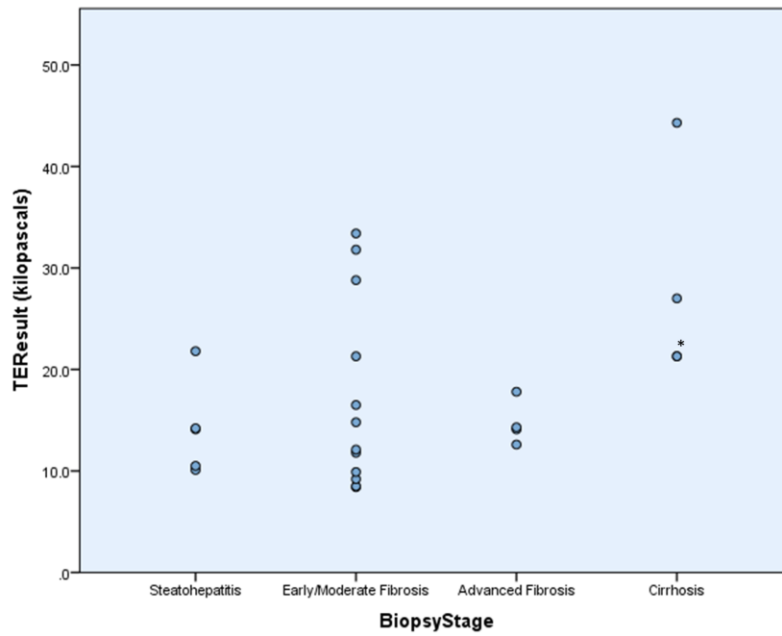

\*2 patients diagnosed with liver cirrhosis had TE readings of 21.3 kilopascals
