# Supplementary material for: Direct targeting of risk factors significantly increases the detection of liver cirrhosis in primary care: a cross-sectional diagnostic study utilising transient elastography
Source: HighWire-hosted journal article supplement (doi:10.1136/bmjopen-2014-007516), 2015-05-01
Supplement: bmjopen-2014-007516supp_table.pdf [file bmjopen-2014-007516supp_table.pdf]

**Supplementary Table 1: Comparison of Biochemical and Clinical Features Between Patients with Normal and Elevated Liver Stiffness**

| Variable                                            | Normal Liver Stiffness<br>(n=268) | Elevated Liver Stiffness<br>(n=98) | P Value          |
|-----------------------------------------------------|-----------------------------------|------------------------------------|------------------|
| Age (Years)                                         | 60.28 (16.02)                     | 64.73 (11.52)                      | <b>0.012</b>     |
| Male - n(%)                                         | 175 (65.3%)                       | 71 (72.4%)                         | 0.197            |
| Body Mass Index (g/m <sup>2</sup> )                 | 27.51 (4.84)                      | 31.16 (5.60)                       | <b>&lt;0.001</b> |
| Type 2 Diabetes - n(%)                              | 135 (50.4%)                       | 69 (70.4%)                         | <b>0.001</b>     |
| Hazardous Alcohol - n(%)                            | 137 (51.1%)                       | 31 (31.6%)                         | <b>0.001</b>     |
| Raised ALT - n(%)                                   | 26 (9.7%)                         | 27(27.6%)                          | <b>&lt;0.001</b> |
| Multiple Risk Factors n(%)                          | 28 (10.4%)                        | 27 (27.6%)                         | <b>&lt;0.001</b> |
| Metabolic Syndrome n(%)                             | 63 (23.5%)                        | 48 (49.0%)                         | <b>&lt;0.001</b> |
| Ischaemic Heart Disease n(%)                        | 31 (11.6%)                        | 19 (19.4%)                         | 0.054            |
| Platelet Count (10 <sup>9</sup> /L)                 | 245.84 (60.53)                    | 226.78 (65.74)                     | <b>0.01</b>      |
| Thrombocytopenia (Platelets<150x10 <sup>9</sup> /L) | 7 (2.6%)                          | 10 (10.2%)                         | <b>0.002</b>     |
| ALT (U/L)                                           | 24.7 (12.0)                       | 37.57 (29.25)                      | <b>&lt;0.001</b> |
| Bilirubin (µmol/L)                                  | 11.78 (4.95)                      | 12.34 (5.31)                       | 0.356            |
| Albumin (g/L)                                       | 37.84 (2.83)                      | 37.81 (3.14)                       | 0.918            |
| AST:ALT Ratio                                       | 1.12 (0.37)                       | 1.01 (0.33)                        | <b>0.012</b>     |
| APRI                                                | 0.32 (0.15)                       | 0.48 (0.45)                        | <b>&lt;0.001</b> |
| APRI>1.5                                            | 0 (0%)                            | 2 (2.0%)                           | 0.07             |
| FIB4                                                | 1.36 (0.61)                       | 1.79 (1.07)                        | <b>&lt;0.001</b> |
| FIB4>3.25                                           | 4 (1.5%)                          | 10 (10.2%)                         | <b>&lt;0.001</b> |

APRI – aspartate aminotransferase/platelet count ratio; FIB4 - (Age x AST) / (Platelets x (square root (ALT))). Numerical variables are displayed as mean(SD) and compared using two sample t test. Categorical variables are displayed as n(%) and compared using chi-squared test. P values reaching statistical significance (p≤0.05) are shown in bold.

**Supplementary Table 2: Laboratory, Imaging and Histopathology Findings of 11 patients diagnosed with cirrhosis during study**

| Liver Disease Risk Factor* | Age | Liver Stiffness (kPa) | Platelet Count (10 <sup>9</sup> /L) | Clinical Features of CLD <sup>‡</sup> | Ultrasound Abnormality         | Histopathology   | Endoscopy Abnormality |
|----------------------------|-----|-----------------------|-------------------------------------|---------------------------------------|--------------------------------|------------------|-----------------------|
| Alcohol and T2DM           | 64  | 17.1                  | 182                                 | No                                    | Splenomegaly (17cm)            | Not Performed    |                       |
| T2DM                       | 63  | 21.3                  | 169                                 | Yes                                   |                                | Cirrhosis (NASH) |                       |
| T2DM                       | 55  | 21.3                  | 260                                 | Yes                                   |                                | Cirrhosis (NASH) |                       |
| T2DM                       | 72  | 26.4                  | 274                                 | Yes                                   | Cirrhosis                      | Not Performed    |                       |
| Alcohol                    | 58  | 27.0                  | 123                                 | Yes                                   | Cirrhosis                      | Not Performed    |                       |
| T2DM                       | 67  | 27.0                  | 131                                 | No                                    |                                | Cirrhosis (NASH) |                       |
| T2DM and raised ALT        | 58  | 44.3                  | 116                                 | No                                    | Cirrhosis, splenomegaly (14cm) | Cirrhosis (NASH) | Grade 1 Varices       |
| T2DM                       | 56  | 48.8                  | 144                                 | No                                    | Cirrhosis, splenomegaly (13cm) | Not Performed    |                       |
| T2DM                       | 65  | 49.6                  | 356                                 | Yes                                   |                                | Not Performed    | PHG                   |
| T2DM                       | 75  | 50.5                  | 109                                 | Yes                                   | Cirrhosis                      | Not Performed    |                       |
| T2DM                       | 73  | 72                    | 260                                 | Yes                                   | Cirrhosis                      | Not Performed    |                       |

\*Patients with alcohol as risk factor were assigned diagnosis of cirrhosis due to alcoholic liver disease. ‡Clinical features of chronic liver disease (CLD) defined as cutaneous signs of CLD (e.g. spider naevi), or clinical examination evidence of hepatomegaly or splenomegaly. Patients with type 2 diabetes without alcohol excess were assigned diagnosis of cirrhosis due to NASH. PHG = portal hypertensive gastropathy, T2DM = type 2 diabetes
